# Supplementary material for: Molecular structures of the 1,6-disubstituted triptycenes Sb2(C6F4)3and Bi2(C6F4)3using gas-phase electron diffraction and ab initio and DFT calculations
Source: Royal Society of Chemistry journal article supplement (doi:10.1039/b514063c), 2005-12-12
Supplement: b514063c.pdf [file b514063c.pdf]

## Molecular structures of the 1,6-disubstituted triptycenes $\text{Sb}_2(\text{C}_6\text{F}_4)_3$ and $\text{Bi}_2(\text{C}_6\text{F}_4)_3$ using gas-phase electron diffraction and *ab initio* and DFT calculations

Derek A. Wann,<sup>a</sup> Sarah L. Hinchley,<sup>a</sup> Heather E. Robertson,<sup>a</sup> Nahalah A. A. Al-Jabar,<sup>b</sup> Alan G. Massey<sup>b</sup> and David W. H. Rankin\*<sup>a</sup>

<sup>a</sup> School of Chemistry, University of Edinburgh, West Mains Road, Edinburgh, UK EH9 3JJ. E-mail: d.w.h.rankin@ed.ac.uk

<sup>b</sup> Department of Chemistry, Loughborough University, Loughborough, Leicestershire, UK LE11 3TU.

**Table S1** Nozzle-to-film distances (mm), weighting functions ( $\text{nm}^{-1}$ ), scale factors, correlation parameters and electron wavelengths (pm) used in the electron diffraction studies of  $\text{Sb}_2(\text{C}_6\text{F}_4)_3$  and  $\text{Bi}_2(\text{C}_6\text{F}_4)_3$ .

|                                      | $\text{Sb}_2(\text{C}_6\text{F}_4)_3$ |          |          | $\text{Bi}_2(\text{C}_6\text{F}_4)_3$ |          |
|--------------------------------------|---------------------------------------|----------|----------|---------------------------------------|----------|
| Nozzle-to-film distance <sup>a</sup> | 94.55                                 | 199.49   | 257.01   | 199.49                                | 256.88   |
| $\Delta s$                           | 2                                     | 1        | 1        | 1                                     | 1        |
| $s_{\text{min}}$                     | 170                                   | 100      | 20       | 52                                    | 20       |
| $sw_1$                               | 190                                   | 120      | 40       | 65                                    | 40       |
| $sw_2$                               | 258                                   | 176      | 129      | 181                                   | 60       |
| $s_{\text{max}}$                     | 300                                   | 205      | 150      | 200                                   | 74       |
| Scale factor <sup>b</sup>            | 0.681(11)                             | 0.793(7) | 0.758(5) | 0.666(8)                              | 0.560(6) |
| Correlation parameter                | -0.413                                | 0.447    | 0.482    | 0.315                                 | -0.153   |
| Electron wavelength                  | 6.013                                 | 6.013    | 6.013    | 6.013                                 | 6.013    |

<sup>a</sup> Determined by reference to the scattering pattern of benzene. <sup>b</sup> Values in parentheses are the estimated standard deviations.

**Table S2** Interatomic distances ( $r_a$ ), amplitudes of vibration ( $u_{h1}$ ) and perpendicular corrections ( $k_{h1}$ ) for the restrained GED structures of  $Z_2(C_6F_4)_3$  ( $Z = Sb, Bi$ ).<sup>a</sup>

| Atom pair |            | $Sb_2(C_6F_4)_3$ |                         |                    |           | $Bi_2(C_6F_4)_3$ |                         |                    |           |
|-----------|------------|------------------|-------------------------|--------------------|-----------|------------------|-------------------------|--------------------|-----------|
|           |            | $r_a/\text{pm}$  | $u_{h1}/\text{pm}^b$    | $k_{h1}/\text{pm}$ | Restraint | $r_a/\text{pm}$  | $u_{h1}/\text{pm}^b$    | $k_{h1}/\text{pm}$ | Restraint |
| $u_1$     | C(3)–F(8)  | 133.1(3)         | 3.6(tied to $u_3$ )     | 0.1                | —         | 132.1(4)         | 4.4(2)                  | 0.1                | 4.2(4)    |
| $u_2$     | C(2)–F(7)  | 134.7(2)         | 3.7(tied to $u_3$ )     | 0.1                | —         | 133.9(4)         | 4.6(tied to $u_1$ )     | 0.1                | —         |
| $u_3$     | C(3)–C(4)  | 137.9(3)         | 3.8(2)                  | 0.1                | 4.4(4)    | 139.3(3)         | 4.7(tied to $u_1$ )     | 0.1                | —         |
| $u_4$     | C(2)–C(1)  | 138.3(2)         | 3.9(tied to $u_3$ )     | 0.1                | —         | 138.5(3)         | 4.8(tied to $u_1$ )     | 0.1                | —         |
| $u_5$     | C(3)–C(2)  | 139.0(2)         | 3.9(tied to $u_3$ )     | 0.1                | —         | 139.4(2)         | 4.9(tied to $u_1$ )     | 0.1                | —         |
| $u_6$     | C(1)–C(6)  | 141.4(4)         | 4.1(tied to $u_3$ )     | 0.1                | —         | 139.8(5)         | 5.0(tied to $u_1$ )     | 0.1                | —         |
| $u_7$     | C(1)–Z(1)  | 214.4(1)         | 3.9(2)                  | 0.2                | —         | 223.0(3)         | 5.8(5)                  | 0.2                | —         |
| $u_8$     | C(3)⋯F(7)  | 232.5(4)         | 5.2(tied to $u_{10}$ )  | –0.1               | —         | 234.2(5)         | 5.6(2)                  | –0.1               | —         |
| $u_9$     | C(3)⋯F(9)  | 235.1(4)         | 5.2(tied to $u_{10}$ )  | –0.1               | —         | 234.4(5)         | 5.6(tied to $u_8$ )     | –0.1               | —         |
| $u_{10}$  | C(2)⋯F(8)  | 235.7(5)         | 5.2(2)                  | –0.1               | —         | 235.7(5)         | 5.7(tied to $u_8$ )     | –0.1               | —         |
| $u_{11}$  | C(1)⋯F(7)  | 237.9(4)         | 5.0(tied to $u_{10}$ )  | –0.3               | —         | 237.8(5)         | 5.5(tied to $u_8$ )     | –0.3               | —         |
| $u_{12}$  | C(3)⋯C(5)  | 238.7(2)         | 4.6(tied to $u_{10}$ )  | –0.2               | —         | 241.0(4)         | 5.0(tied to $u_8$ )     | –0.2               | —         |
| $u_{13}$  | C(2)⋯C(6)  | 240.3(3)         | 4.7(tied to $u_{10}$ )  | –0.2               | —         | 240.8(6)         | 5.1(tied to $u_8$ )     | –0.2               | —         |
| $u_{14}$  | C(3)⋯C(1)  | 242.3(5)         | 4.6(tied to $u_{10}$ )  | –0.2               | —         | 240.5(6)         | 5.0(tied to $u_8$ )     | –0.2               | —         |
| $u_{15}$  | F(7)⋯F(8)  | 265.4(9)         | 14.7(5)                 | 0.4                | —         | 269.4(9)         | 11.6(4)                 | 0.4                | 11.1(11)  |
| $u_{16}$  | F(7)⋯F(9)  | 272.0(14)        | 15.0(tied to $u_{15}$ ) | –0.2               | —         | 268.9(15)        | 11.8(tied to $u_{15}$ ) | –0.2               | —         |
| $u_{17}$  | C(2)⋯C(5)  | 273.5(5)         | 8.3(tied to $u_{15}$ )  | –0.5               | —         | 277.8(10)        | 6.5(tied to $u_{15}$ )  | –0.5               | —         |
| $u_{18}$  | C(3)⋯C(6)  | 279.3(4)         | 8.5(tied to $u_{15}$ )  | –0.3               | —         | 277.9(6)         | 6.7(tied to $u_{15}$ )  | –0.3               | —         |
| $u_{19}$  | C(2)⋯Z(1)  | 303.6(3)         | 9.5(tied to $u_{22}$ )  | 0.1                | —         | 308.2(4)         | 10.7(tied to $u_{22}$ ) | 0.1                | —         |
| $u_{20}$  | C(1)⋯C(1)' | 307.2(3)         | 12.5(tied to $u_{22}$ ) | –0.2               | —         | 316.3(5)         | 14.3(tied to $u_{22}$ ) | 0.4                | —         |
| $u_{21}$  | C(1)⋯Z(2)  | 315.4(2)         | 8.6(tied to $u_{22}$ )  | –0.2               | —         | 323.4(3)         | 9.6(tied to $u_{22}$ )  | –0.2               | —         |
| $u_{22}$  | F(7)⋯Z(1)  | 316.3(4)         | 14.9(3)                 | 0.4                | —         | 316.1(5)         | 17.0(4)                 | –0.2               | —         |
| $u_{23}$  | C(1)⋯C(6)' | 338.1(3)         | 11.8(fixed)             | –0.3               | —         | 345.8(5)         | 11.7(tied to $u_{26}$ ) | –0.3               | —         |
| $u_{24}$  | C(3)⋯F(10) | 358.2(3)         | 6.1(tied to $u_{26}$ )  | –0.8               | —         | 361.1(4)         | 6.0(tied to $u_{26}$ )  | –0.8               | —         |

|          |             |          |                         |      |        |          |                         |      |        |
|----------|-------------|----------|-------------------------|------|--------|----------|-------------------------|------|--------|
| $u_{25}$ | C(2)⋯F(9)   | 360.4(3) | 6.1(tied to $u_{26}$ )  | -0.8 | —      | 360.7(4) | 6.0(tied to $u_{26}$ )  | -0.7 | —      |
| $u_{26}$ | C(1)⋯F(8)   | 362.4(4) | 6.1(2)                  | -0.7 | —      | 360.9(5) | 6.0(4)                  | -0.6 | —      |
| $u_{27}$ | C(1)⋯F(10)  | 364.7(3) | 6.1(tied to $u_{26}$ )  | -0.7 | —      | 364.1(5) | 6.0(tied to $u_{26}$ )  | -0.7 | —      |
| $u_{28}$ | Z(1)⋯Z(2)   | 380.1(2) | 7.9(2)                  | -0.4 | —      | 393.7(4) | 10.5(3)                 | -0.5 | —      |
| $u_{29}$ | C(2)⋯F(10)  | 407.5(5) | 6.8(tied to $u_{31}$ )  | -1.1 | —      | 411.2(9) | 6.5(fixed)              | -1.1 | —      |
| $u_{30}$ | C(1)⋯F(9)   | 411.7(3) | 6.9(tied to $u_{31}$ )  | -1.1 | —      | 409.3(6) | 6.7(fixed)              | -1.0 | —      |
| $u_{31}$ | C(2)⋯C(1)'  | 421.3(3) | 15.1(8)                 | -0.8 | —      | 429.4(4) | 15.2(fixed)             | -0.9 | —      |
| $u_{32}$ | C(3)⋯Z(1)   | 436.4(4) | 9.7(6)                  | -0.8 | —      | 441.6(5) | 9.7(7)                  | -0.9 | —      |
| $u_{33}$ | C(2)⋯Z(2)   | 442.3(2) | 9.0(tied to $u_{32}$ )  | -1.0 | —      | 451.5(4) | 8.8(tied to $u_{32}$ )  | -1.0 | —      |
| $u_{34}$ | F(8)⋯F(10)  | 466.1(5) | 9.8(tied to $u_{36}$ )  | -1.6 | —      | 467.2(6) | 7.9(fixed)              | -1.6 | —      |
| $u_{35}$ | C(2)⋯C(6)'  | 464.3(4) | 18.5(tied to $u_{36}$ ) | -1.2 | —      | 472.1(5) | 15.6(fixed)             | -1.3 | —      |
| $u_{36}$ | C(1)⋯F(7)'  | 466.6(4) | 23.0(11)                | -1.4 | —      | 472.7(4) | 19.2(fixed)             | -1.4 | —      |
| $u_{37}$ | C(3)⋯Z(2)   | 492.1(4) | 12.7(10)                | -1.4 | —      | 499.3(5) | 8.2(7)                  | -1.5 | 8.1(8) |
| $u_{38}$ | C(2)⋯C(2)'  | 515.4(5) | 23.5(tied to $u_{42}$ ) | -1.6 | —      | 522.0(5) | 24.6(tied to $u_{42}$ ) | -1.6 | —      |
| $u_{39}$ | F(7)⋯F(7)'  | 526.9(7) | 34.6(tied to $u_{42}$ ) | -0.9 | —      | 529.1(9) | 35.7(tied to $u_{42}$ ) | -1.8 | —      |
| $u_{40}$ | C(3)⋯C(1)'  | 529.6(4) | 18.2(tied to $u_{42}$ ) | -1.8 | —      | 536.7(6) | 19.2(tied to $u_{42}$ ) | -1.0 | —      |
| $u_{41}$ | F(7)⋯F(10)  | 541.2(6) | 7.6(tied to $u_{42}$ )  | -1.9 | —      | 544.3(9) | 7.6(tied to $u_{42}$ )  | -1.2 | —      |
| $u_{42}$ | F(8)⋯Z(1)   | 536.2(5) | 11.3(2)                 | -1.2 | —      | 541.0(5) | 11.9(3)                 | -1.8 | —      |
| $u_{43}$ | C(2)⋯F(7)'  | 537.9(3) | 28.8(tied to $u_{42}$ ) | -1.7 | —      | 541.9(4) | 29.9(tied to $u_{42}$ ) | -1.8 | —      |
| $u_{44}$ | C(1)⋯F(10)' | 542.2(3) | 19.7(tied to $u_{42}$ ) | -1.9 | —      | 546.9(4) | 20.6(tied to $u_{42}$ ) | -1.9 | —      |
| $u_{45}$ | F(7)⋯Z(2)   | 552.2(3) | 9.8(tied to $u_{42}$ )  | -1.8 | —      | 559.9(4) | 10.1(tied to $u_{42}$ ) | -1.8 | —      |
| $u_{46}$ | C(3)⋯C(6)'  | 547.4(5) | 18.3(tied to $u_{42}$ ) | -1.9 | —      | 554.3(6) | 19.3(tied to $u_{42}$ ) | -2.0 | —      |
| $u_{47}$ | C(2)⋯C(5)'  | 582.9(4) | 22.6(tied to $u_{42}$ ) | -2.3 | —      | 590.8(6) | 23.6(tied to $u_{42}$ ) | -2.4 | —      |
| $u_{48}$ | F(8)⋯Z(2)   | 624.3(3) | 9.7(2)                  | -2.4 | 8.4(8) | 630.3(5) | 10.2(6)                 | -2.5 | 8.5(9) |
| $u_{49}$ | C(3)⋯C(2)'  | 625.6(6) | 29.0(tied to $u_{48}$ ) | -2.7 | —      | 632.3(7) | 25.9(fixed)             | -2.8 | —      |
| $u_{50}$ | C(1)⋯F(8)'  | 642.6(4) | 22.2(tied to $u_{48}$ ) | -2.6 | —      | 649.9(5) | 21.0(7)                 | -2.6 | —      |
| $u_{51}$ | C(3)⋯C(5)'  | 654.7(5) | 28.4(tied to $u_{48}$ ) | -3.0 | —      | 661.8(6) | 26.8(tied to $u_{50}$ ) | -3.1 | —      |
| $u_{52}$ | C(2)⋯F(10)' | 660.4(3) | 27.0(tied to $u_{48}$ ) | -3.1 | —      | 666.3(5) | 25.2(tied to $u_{50}$ ) | -3.2 | —      |
| $u_{53}$ | C(3)⋯F(7)'  | 658.5(4) | 34.6(tied to $u_{48}$ ) | -3.0 | —      | 663.0(5) | 32.3(tied to $u_{50}$ ) | -3.2 | —      |
| $u_{54}$ | C(1)⋯F(9)'  | 671.4(4) | 21.9(tied to $u_{48}$ ) | -3.0 | —      | 677.8(5) | 20.7(tied to $u_{50}$ ) | -3.0 | —      |

|                        |               |          |                                       |      |   |           |                                       |      |   |
|------------------------|---------------|----------|---------------------------------------|------|---|-----------|---------------------------------------|------|---|
| <i>u</i> <sub>55</sub> | C(3)···F(10)' | 712.4(4) | 32.3(10)                              | -3.6 | — | 717.1(5)  | 33.8(tied to <i>u</i> <sub>59</sub> ) | -3.8 | — |
| <i>u</i> <sub>56</sub> | C(3)···C(3)'  | 722.5(8) | 34.6(tied to <i>u</i> <sub>55</sub> ) | -3.8 | — | 728.4(10) | 36.6(tied to <i>u</i> <sub>59</sub> ) | -3.9 | — |
| <i>u</i> <sub>57</sub> | C(2)···F(8)'  | 726.9(5) | 33.5(tied to <i>u</i> <sub>55</sub> ) | -3.4 | — | 733.3(6)  | 35.4(tied to <i>u</i> <sub>59</sub> ) | -3.5 | — |
| <i>u</i> <sub>58</sub> | C(3)···C(4)'  | 735.4(8) | 34.3(tied to <i>u</i> <sub>55</sub> ) | -3.9 | — | 741.4(10) | 36.3(tied to <i>u</i> <sub>59</sub> ) | -4.1 | — |
| <i>u</i> <sub>59</sub> | F(7)···F(8)'  | 744.0(5) | 39.8(tied to <i>u</i> <sub>55</sub> ) | -3.4 | — | 748.8(5)  | 41.7(20)                              | -3.6 | — |
| <i>u</i> <sub>60</sub> | F(7)···F(10)' | 753.8(6) | 27.8(tied to <i>u</i> <sub>55</sub> ) | -4.2 | — | 757.6(8)  | 29.1(tied to <i>u</i> <sub>59</sub> ) | -4.2 | — |
| <i>u</i> <sub>61</sub> | C(2)···F(9)'  | 775.8(4) | 32.1(tied to <i>u</i> <sub>55</sub> ) | -4.2 | — | 781.9(5)  | 33.9(tied to <i>u</i> <sub>59</sub> ) | -4.3 | — |
| <i>u</i> <sub>62</sub> | C(3)···F(8)'  | 824.8(6) | 43.8(tied to <i>u</i> <sub>63</sub> ) | -4.8 | — | 830.9(8)  | 44.1(26)                              | -5.0 | — |
| <i>u</i> <sub>63</sub> | F(8)···F(10)' | 835.8(3) | 38.5(15)                              | -5.0 | — | 839.8(4)  | 38.4(tied to <i>u</i> <sub>62</sub> ) | -5.1 | — |
| <i>u</i> <sub>64</sub> | C(3)···F(9)'  | 846.8(6) | 43.1(tied to <i>u</i> <sub>63</sub> ) | -5.3 | — | 852.7(8)  | 43.3(tied to <i>u</i> <sub>62</sub> ) | -5.4 | — |
| <i>u</i> <sub>65</sub> | F(8)···F(8)'  | 918.6(8) | 44.7(fixed)                           | -5.8 | — | 925.0(8)  | 45.8(fixed)                           | -6.0 | — |
| <i>u</i> <sub>66</sub> | F(8)···F(9)'  | 957.3(6) | 43.2(fixed)                           | -6.6 | — | 962.6(8)  | 44.3(fixed)                           | -6.8 | — |

<sup>a</sup> Estimated standard deviations, as obtained in the least squares refinement, are given in parentheses. <sup>b</sup> Amplitudes not refined were fixed at the values obtained using the force field calculated at [RHF/aug-cc-pVQZ-PP/6-31G\*] for Sb<sub>2</sub>(C<sub>6</sub>F<sub>4</sub>)<sub>3</sub> and Bi<sub>2</sub>(C<sub>6</sub>F<sub>4</sub>)<sub>3</sub>.

**Table S3** Least-squares correlation matrix ( $\times 100$ ) for  $\text{Sb}_2(\text{C}_6\text{F}_4)_3$ .<sup>a</sup>

|          | $p_5$ | $p_9$ | $p_{10}$ | $p_{11}$ | $u_3$ | $u_{10}$ | $u_{28}$ | $u_{32}$ | $u_{36}$ | $u_{37}$ | $k_2$ | $k_3$ |
|----------|-------|-------|----------|----------|-------|----------|----------|----------|----------|----------|-------|-------|
| $p_1$    | -86   | -67   | -56      |          | -75   |          |          |          |          |          |       |       |
| $p_2$    |       |       |          | -75      |       |          |          |          |          |          |       |       |
| $p_5$    |       |       |          |          | 80    |          |          |          |          |          |       |       |
| $p_7$    |       |       | 52       |          |       | 61       |          |          |          |          |       |       |
| $p_9$    |       |       | 71       |          |       |          |          |          |          |          |       |       |
| $u_3$    |       |       |          |          |       | 68       |          |          |          |          |       | 61    |
| $u_7$    |       |       |          |          |       | 69       |          |          |          |          |       | 59    |
| $u_{10}$ |       |       |          |          |       |          |          |          |          |          |       | 69    |
| $u_{26}$ |       |       |          |          |       |          | 69       |          |          |          |       |       |
| $u_{31}$ |       |       |          |          |       |          |          | 62       | 56       |          |       |       |
| $u_{32}$ |       |       |          |          |       |          |          |          | 79       |          |       |       |
| $u_{36}$ |       |       |          |          |       |          |          |          |          | 69       |       |       |
| $k_1$    |       |       |          |          |       |          |          |          |          |          | 51    |       |
| $k_2$    |       |       |          |          |       |          |          |          |          |          |       | 62    |

<sup>a</sup> Only elements with absolute values  $\geq 50\%$  are shown;  $k_1$ ,  $k_2$  and  $k_3$  are scale factors.

**Table S4** Least-squares correlation matrix ( $\times 100$ ) for  $\text{Bi}_2(\text{C}_6\text{F}_4)_3$ .<sup>a</sup>

|          | $p_5$ | $p_7$ | $p_{10}$ | $p_{11}$ | $u_1$ | $u_{59}$ |
|----------|-------|-------|----------|----------|-------|----------|
| $p_1$    | -87   | -51   |          |          | -60   |          |
| $p_2$    |       |       |          | -58      |       |          |
| $p_5$    |       |       |          |          | 64    |          |
| $p_9$    |       |       | 65       |          |       |          |
| $u_{50}$ |       |       |          |          |       | 51       |

<sup>a</sup> Only elements with absolute values  $\geq 50\%$  are shown.

**Figure S1** Experimental and difference (experimental – theoretical) molecular-scattering intensities for  $\text{Sb}_2(\text{C}_6\text{F}_4)_3$ .

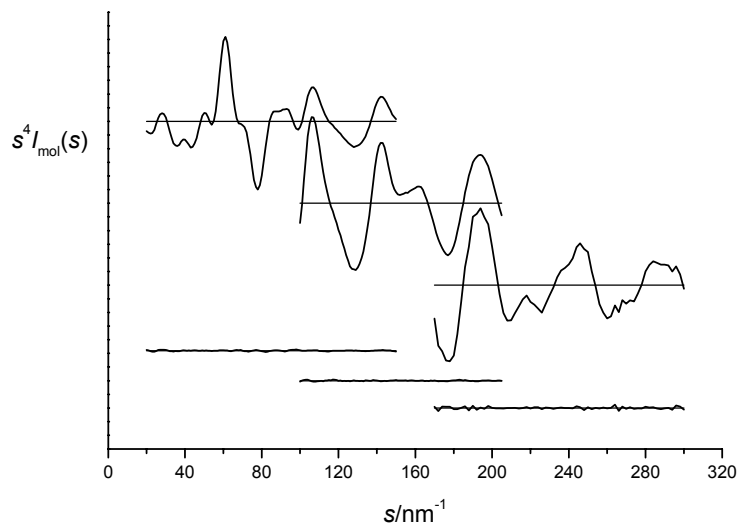

**Figure S2** Experimental and difference (experimental – theoretical) molecular-scattering intensities for  $\text{Bi}_2(\text{C}_6\text{F}_4)_3$ .

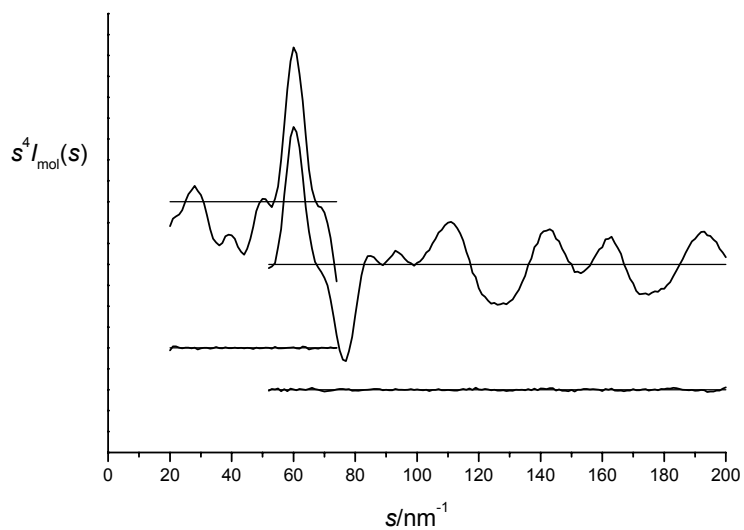

**Table S5** Experimental (GED) coordinates for  $\text{Sb}_2(\text{C}_6\text{F}_4)_3$ .<sup>a</sup>

| Atom    | <i>x</i> | <i>y</i> | <i>z</i> |
|---------|----------|----------|----------|
| C(1)    | 0.0000   | 4.2028   | 0.6926   |
| C(2)    | 0.0000   | 2.9899   | 1.3693   |
| C(3)    | 0.0000   | 1.7772   | 0.7043   |
| C(4)    | 0.0000   | 1.7772   | -0.7043  |
| C(5)    | 0.0000   | 2.9899   | -1.3693  |
| C(6)    | 0.0000   | 4.2028   | -0.6926  |
| F(7)    | 0.0000   | 5.3485   | 1.3640   |
| F(8)    | 0.0000   | 3.0618   | 2.7161   |
| F(9)    | 0.0000   | 3.0618   | -2.7161  |
| F(10)   | 0.0000   | 5.3485   | -1.3640  |
| C(1)'   | -3.6398  | -2.1014  | 0.6926   |
| C(2)'   | -2.5894  | -1.4950  | 1.3693   |
| C(3)'   | -1.5391  | -0.8886  | 0.7043   |
| C(4)'   | -1.5391  | -0.8886  | -0.7043  |
| C(5)'   | -2.5894  | -1.4950  | -1.3693  |
| C(6)'   | -3.6398  | -2.1014  | -0.6926  |
| F(7)'   | -4.6319  | -2.6742  | 1.3640   |
| F(8)'   | -2.6516  | -1.5309  | 2.7161   |
| F(9)'   | -2.6516  | -1.5309  | -2.7161  |
| F(10)'  | -4.6319  | -2.6742  | -1.3640  |
| C(1)''  | 3.6398   | -2.1014  | 0.6926   |
| C(2)''  | 2.5894   | -1.4950  | 1.3693   |
| C(3)''  | 1.5391   | -0.8886  | 0.7043   |
| C(4)''  | 1.5391   | -0.8886  | -0.7043  |
| C(5)''  | 2.5894   | -1.4950  | -1.3693  |
| C(6)''  | 3.6398   | -2.1014  | -0.6926  |
| F(7)''  | 4.6319   | -2.6742  | 1.3640   |
| F(8)''  | 2.6516   | -1.5309  | 2.7161   |
| F(9)''  | 2.6516   | -1.5309  | -2.7161  |
| F(10)'' | 4.6319   | -2.6742  | -1.3640  |
| Sb(1)   | 0.0000   | 0.0000   | 1.9029   |
| Sb(2)   | 0.0000   | 0.0000   | -1.9029  |

<sup>a</sup> All coordinates in Å.

**Table S6** Experimental (GED) coordinates for  $\text{Bi}_2(\text{C}_6\text{F}_4)_3$ .<sup>a</sup>

| Atom    | <i>x</i> | <i>y</i> | <i>z</i> |
|---------|----------|----------|----------|
| C(1)    | 0.0000   | 4.2386   | 0.6966   |
| C(2)    | 0.0000   | 3.0298   | 1.3921   |
| C(3)    | 0.0000   | 1.8304   | 0.6994   |
| C(4)    | 0.0000   | 1.8304   | -0.6994  |
| C(5)    | 0.0000   | 3.0298   | -1.3921  |
| C(6)    | 0.0000   | 4.2386   | -0.6966  |
| F(7)    | 0.0000   | 5.3880   | 1.3481   |
| F(8)    | 0.0000   | 3.0744   | 2.7309   |
| F(9)    | 0.0000   | 3.0744   | -2.7309  |
| F(10)   | 0.0000   | 5.3880   | -1.3481  |
| C(1)'   | 3.6707   | -2.1193  | 0.6966   |
| C(2)'   | -2.6239  | -1.5149  | 1.3921   |
| C(3)'   | -1.5852  | -0.9152  | 0.6994   |
| C(4)'   | -1.5852  | -0.9152  | -0.6994  |
| C(5)'   | -2.6239  | -1.5149  | -1.3921  |
| C(6)'   | -3.6707  | -2.1193  | -0.6966  |
| F(7)'   | -4.6661  | -2.6940  | 1.3481   |
| F(8)'   | -2.6625  | -1.5372  | 2.7309   |
| F(9)'   | -2.6625  | -1.5372  | -2.7309  |
| F(10)'  | -4.6661  | -2.6940  | -1.3481  |
| C(1)''  | 3.6707   | -2.1193  | 0.6966   |
| C(2)''  | 2.6239   | -1.5149  | 1.3921   |
| C(3)''  | 1.5852   | -0.9152  | 0.6994   |
| C(4)''  | 1.5852   | -0.9152  | -0.6994  |
| C(5)''  | 2.6239   | -1.5149  | -1.3921  |
| C(6)''  | 3.6707   | -2.1193  | -0.6966  |
| F(7)''  | 4.6661   | -2.6940  | 1.3481   |
| F(8)''  | 2.6625   | -1.5372  | 2.7309   |
| F(9)''  | 2.6625   | -1.5372  | -2.7309  |
| F(10)'' | 4.6661   | -2.6940  | -1.3481  |
| Bi(1)   | 0.0000   | 0.0000   | 1.9722   |
| Bi(2)   | 0.0000   | 0.0000   | -1.9722  |

<sup>a</sup> All coordinates in Å.



**Table S7** Calculated [MP2/LanL2DZ/6-311G\*] coordinates for Sb<sub>2</sub>(C<sub>6</sub>F<sub>4</sub>)<sub>3</sub>.<sup>a</sup>

| Atom    | <i>x</i> | <i>y</i> | <i>z</i> |
|---------|----------|----------|----------|
| C(1)    | 0.0000   | 4.2340   | 0.6958   |
| C(2)    | 0.0000   | 3.0149   | 1.3756   |
| C(3)    | 0.0000   | 1.7943   | 0.7046   |
| C(4)    | 0.0000   | 1.7943   | -0.7046  |
| C(5)    | 0.0000   | 3.0149   | -1.3756  |
| C(6)    | 0.0000   | 4.2340   | -0.6958  |
| F(7)    | 0.0000   | 5.3878   | 1.3598   |
| F(8)    | 0.0000   | 3.0692   | 2.7204   |
| F(9)    | 0.0000   | 3.0692   | -2.7204  |
| F(10)   | 0.0000   | 5.3878   | -1.3598  |
| C(1)'   | -3.6668  | -2.1170  | 0.6958   |
| C(2)'   | -2.6110  | -1.5075  | 1.3756   |
| C(3)'   | -1.5539  | -0.8971  | 0.7046   |
| C(4)'   | -1.5539  | -0.8971  | -0.7046  |
| C(5)'   | -2.6110  | -1.5075  | -1.3756  |
| C(6)'   | -3.6668  | -2.1170  | -0.6958  |
| F(7)'   | -4.6659  | -2.6939  | 1.3598   |
| F(8)'   | -2.6580  | -1.5346  | 2.7204   |
| F(9)'   | -2.6580  | -1.5346  | -2.7204  |
| F(10)'  | -4.6659  | -2.6939  | -1.3598  |
| C(1)''  | 3.6668   | -2.1170  | 0.6958   |
| C(2)''  | 2.6110   | -1.5075  | 1.3756   |
| C(3)''  | 1.5539   | -0.8971  | 0.7046   |
| C(4)''  | 1.5539   | -0.8971  | -0.7046  |
| C(5)''  | 2.6110   | -1.5075  | -1.3756  |
| C(6)''  | 3.6668   | -2.1170  | -0.6958  |
| F(7)''  | 4.6659   | -2.6939  | 1.3598   |
| F(8)''  | 2.6580   | -1.5346  | 2.7204   |
| F(9)''  | 2.6580   | -1.5346  | -2.7204  |
| F(10)'' | 4.6659   | -2.6939  | -1.3598  |
| Sb(1)   | 0.0000   | 0.0000   | 1.9271   |
| Sb(2)   | 0.0000   | 0.0000   | -1.9271  |

<sup>a</sup> All coordinates in Å.

Energy = -1890.60154 Hartrees (corrected for ZPE).

**Table S8** Calculated [MP2/aug-cc-pVQZ-PP/6-311G\*] coordinates for Sb<sub>2</sub>(C<sub>6</sub>F<sub>4</sub>)<sub>3</sub>.<sup>a</sup>

| Atom    | <i>x</i> | <i>y</i> | <i>z</i> |
|---------|----------|----------|----------|
| C(1)    | 0.0000   | 1.7667   | 0.7040   |
| C(2)    | 0.0000   | 2.9823   | 1.3820   |
| C(3)    | 0.0000   | 4.2004   | 0.6979   |
| C(4)    | 0.0000   | 4.2004   | -0.6979  |
| C(5)    | 0.0000   | 2.9823   | -1.3820  |
| C(6)    | 0.0000   | 1.7667   | -0.7040  |
| F(7)    | 0.0000   | 3.0162   | 2.7267   |
| F(8)    | 0.0000   | 5.3553   | 1.3589   |
| F(9)    | 0.0000   | 5.3553   | -1.3589  |
| F(10)   | 0.0000   | 3.0162   | -2.7267  |
| C(1)'   | -3.6376  | -2.1002  | -0.6979  |
| C(2)'   | -3.6376  | -2.1002  | 0.6979   |
| C(3)'   | -2.5828  | -1.4912  | 1.3820   |
| C(4)'   | -1.5300  | -0.8833  | 0.7040   |
| C(5)'   | -1.5300  | -0.8833  | -0.7040  |
| C(6)'   | -2.5828  | -1.4912  | -1.3820  |
| F(7)'   | -4.6378  | -2.6777  | 1.3589   |
| F(8)'   | -2.6121  | -1.5081  | 2.7267   |
| F(9)'   | -2.6121  | -1.5081  | -2.7267  |
| F(10)'  | -4.6378  | -2.6777  | -1.3589  |
| C(1)''  | 2.5828   | -1.4912  | 1.3820   |
| C(2)''  | 1.5300   | -0.8833  | 0.7040   |
| C(3)''  | 1.5300   | -0.8833  | -0.7040  |
| C(4)''  | 2.5828   | -1.4912  | -1.3820  |
| C(5)''  | 3.6376   | -2.1002  | -0.6979  |
| C(6)''  | 3.6376   | -2.1002  | 0.6979   |
| F(7)''  | 4.6378   | -2.6777  | 1.3589   |
| F(8)''  | 2.6121   | -1.5081  | 2.7267   |
| F(9)''  | 2.6121   | -1.5081  | -2.7267  |
| F(10)'' | 4.6378   | -2.6777  | -1.3589  |
| Sb(1)   | 0.0000   | 0.0000   | 1.9006   |
| Sb(2)   | 0.0000   | 0.0000   | -1.9006  |

<sup>a</sup> All coordinates in Å.

Energy = -2353.72102 Hartrees (corrected for ZPE).

**Table S9** Calculated [B3PW91/LanL2DZ/6-311G\*] coordinates for Sb<sub>2</sub>(C<sub>6</sub>F<sub>4</sub>)<sub>3</sub>.<sup>a</sup>

| Atom    | <i>x</i> | <i>y</i> | <i>z</i> |
|---------|----------|----------|----------|
| C(1)    | 0.0000   | 4.2240   | 0.6932   |
| C(2)    | 0.0000   | 3.0097   | 1.3718   |
| C(3)    | 0.0000   | 1.8000   | 0.7003   |
| C(4)    | 0.0000   | 1.8000   | -0.7003  |
| C(5)    | 0.0000   | 3.0097   | -1.3718  |
| C(6)    | 0.0000   | 4.2240   | -0.6932  |
| F(7)    | 0.0000   | 5.3750   | 1.3561   |
| F(8)    | 0.0000   | 3.0531   | 2.7144   |
| F(9)    | 0.0000   | 3.0531   | -2.7144  |
| F(10)   | 0.0000   | 5.3750   | -1.3561  |
| C(1)'   | -3.6580  | -2.1120  | 0.6932   |
| C(2)'   | -2.6065  | -1.5048  | 1.3718   |
| C(3)'   | -1.5589  | -0.9000  | 0.7003   |
| C(4)'   | -1.5589  | -0.9000  | -0.7003  |
| C(5)'   | -2.6065  | -1.5048  | -1.3718  |
| C(6)'   | -3.6580  | -2.1120  | -0.6932  |
| F(7)'   | -4.6549  | -2.6875  | 1.3561   |
| F(8)'   | -2.6441  | -1.5266  | 2.7144   |
| F(9)'   | -2.6441  | -1.5266  | -2.7144  |
| F(10)'  | -4.6549  | -2.6875  | -1.3561  |
| C(1)''  | 3.6580   | -2.1120  | 0.6932   |
| C(2)''  | 2.6065   | -1.5048  | 1.3718   |
| C(3)''  | 1.5589   | -0.9000  | 0.7003   |
| C(4)''  | 1.5589   | -0.9000  | -0.7003  |
| C(5)''  | 2.6065   | -1.5048  | -1.3718  |
| C(6)''  | 3.6580   | -2.1120  | -0.6932  |
| F(7)''  | 4.6549   | -2.6875  | 1.3561   |
| F(8)''  | 2.6441   | -1.5266  | 2.7144   |
| F(9)''  | 2.6441   | -1.5266  | -2.7144  |
| F(10)'' | 4.6549   | -2.6875  | -1.3561  |
| Sb(1)   | 0.0000   | 0.0000   | 1.9099   |
| Sb(2)   | 0.0000   | 0.0000   | -1.9099  |

<sup>a</sup> All coordinates in Å.

Energy = -2364.43391 Hartrees (corrected for ZPE).

**Table S10** Calculated [B3PW91/aug-cc-pVQZ-PP/6-311G\*] coordinates for Sb<sub>2</sub>(C<sub>6</sub>F<sub>4</sub>)<sub>3</sub>.<sup>a</sup>

| Atom    | <i>x</i> | <i>y</i> | <i>z</i> |
|---------|----------|----------|----------|
| C(1)    | 0.0000   | 4.2236   | 0.6933   |
| C(2)    | 0.0000   | 3.0091   | 1.3708   |
| C(3)    | 0.0000   | 1.7987   | 0.7009   |
| C(4)    | 0.0000   | 1.7987   | -0.7009  |
| C(5)    | 0.0000   | 3.0091   | -1.3708  |
| C(6)    | 0.0000   | 4.2236   | -0.6933  |
| F(7)    | 0.0000   | 5.3743   | 1.3563   |
| F(8)    | 0.0000   | 3.0518   | 2.7140   |
| F(9)    | 0.0000   | 3.0518   | -2.7140  |
| F(10)   | 0.0000   | 5.3743   | -1.3563  |
| C(1)'   | -3.6578  | -2.1118  | 0.6933   |
| C(2)'   | -2.6059  | -1.5045  | 1.3708   |
| C(3)'   | -1.5577  | -0.8993  | 0.7009   |
| C(4)'   | -1.5577  | -0.8993  | -0.7009  |
| C(5)'   | -2.6059  | -1.5045  | -1.3708  |
| C(6)'   | -3.6578  | -2.1118  | -0.6933  |
| F(7)'   | -4.6543  | -2.6872  | 1.3563   |
| F(8)'   | -2.6429  | -1.5259  | 2.7140   |
| F(9)'   | -2.6429  | -1.5259  | -2.7140  |
| F(10)'  | -4.6543  | -2.6872  | -1.3563  |
| C(1)''  | 3.6578   | -2.1118  | 0.6933   |
| C(2)''  | 2.6059   | -1.5045  | 1.3708   |
| C(3)''  | 1.5577   | -0.8993  | 0.7009   |
| C(4)''  | 1.5577   | -0.8993  | -0.7009  |
| C(5)''  | 2.6059   | -1.5045  | -1.3708  |
| C(6)''  | 3.6578   | -2.1118  | -0.6933  |
| F(7)''  | 4.6543   | -2.6872  | 1.3563   |
| F(8)''  | 2.6429   | -1.5259  | 2.7140   |
| F(9)''  | 2.6429   | -1.5259  | -2.7140  |
| F(10)'' | 4.6543   | -2.6872  | -1.3563  |
| Sb(1)   | 0.0000   | 0.0000   | 1.9097   |
| Sb(2)   | 0.0000   | 0.0000   | -1.9097  |

<sup>a</sup> All coordinates in Å.

Energy = -2364.43391 Hartrees (corrected for ZPE).

**Table S11** Calculated [B3LYP/LanL2DZ/6-311G\*] coordinates for Sb<sub>2</sub>(C<sub>6</sub>F<sub>4</sub>)<sub>3</sub>.<sup>a</sup>

| Atom    | <i>x</i> | <i>y</i> | <i>z</i> |
|---------|----------|----------|----------|
| C(1)    | 0.0000   | 4.2462   | 0.6932   |
| C(2)    | 0.0000   | 3.0303   | 1.3714   |
| C(3)    | 0.0000   | 1.8173   | 0.7021   |
| C(4)    | 0.0000   | 1.8173   | -0.7021  |
| C(5)    | 0.0000   | 3.0303   | -1.3714  |
| C(6)    | 0.0000   | 4.2462   | -0.6932  |
| F(7)    | 0.0000   | 5.4011   | 1.3610   |
| F(8)    | 0.0000   | 3.0769   | 2.7205   |
| F(9)    | 0.0000   | 3.0769   | -2.7205  |
| F(10)   | 0.0000   | 5.4011   | -1.3610  |
| C(1)'   | -3.6773  | -2.1231  | 0.6932   |
| C(2)'   | -2.6243  | -1.5151  | 1.3714   |
| C(3)'   | -1.5738  | -0.9086  | 0.7021   |
| C(4)'   | -1.5738  | -0.9086  | -0.7021  |
| C(5)'   | -2.6243  | -1.5151  | -1.3714  |
| C(6)'   | -3.6773  | -2.1231  | -0.6932  |
| F(7)'   | -4.6775  | -2.7006  | 1.3610   |
| F(8)'   | -2.6647  | -1.5384  | 2.7205   |
| F(9)'   | -2.6647  | -1.5384  | -2.7205  |
| F(10)'  | -4.6775  | -2.7006  | -1.3610  |
| C(1)''  | 3.6773   | -2.1231  | 0.6932   |
| C(2)''  | 2.6243   | -1.5151  | 1.3714   |
| C(3)''  | 1.5738   | -0.9086  | 0.7021   |
| C(4)''  | 1.5738   | -0.9086  | -0.7021  |
| C(5)''  | 2.6243   | -1.5151  | -1.3714  |
| C(6)''  | 3.6773   | -2.1231  | -0.6932  |
| F(7)''  | 4.6775   | -2.7006  | 1.3610   |
| F(8)''  | 2.6647   | -1.5384  | 2.7205   |
| F(9)''  | 2.6647   | -1.5384  | -2.7205  |
| F(10)'' | 4.6775   | -2.7006  | -1.3610  |
| Sb(1)   | 0.0000   | 0.0000   | 1.9279   |
| Sb(2)   | 0.0000   | 0.0000   | -1.9279  |

<sup>a</sup> All coordinates in Å.

Energy = -1895.18126 Hartrees (corrected for ZPE).

**Table S12** Calculated [B3LYP/aug-cc-pVQZ-PP/6-311G\*] coordinates for Sb<sub>2</sub>(C<sub>6</sub>F<sub>4</sub>)<sub>3</sub>.<sup>a</sup>

| Atom    | <i>x</i> | <i>y</i> | <i>z</i> |
|---------|----------|----------|----------|
| C(1)    | 0.0000   | 4.2387   | 0.6940   |
| C(2)    | 0.0000   | 3.0221   | 1.3704   |
| C(3)    | 0.0000   | 1.8100   | 0.7016   |
| C(4)    | 0.0000   | 1.8100   | -0.7016  |
| C(5)    | 0.0000   | 3.0221   | -1.3704  |
| C(6)    | 0.0000   | 4.2387   | -0.6940  |
| F(7)    | 0.0000   | 5.3939   | 1.3613   |
| F(8)    | 0.0000   | 3.0625   | 2.7220   |
| F(9)    | 0.0000   | 3.0625   | -2.7220  |
| F(10)   | 0.0000   | 5.3939   | -1.3613  |
| C(1)'   | -3.6708  | -2.1193  | 0.6940   |
| C(2)'   | -2.6172  | -1.5111  | 1.3704   |
| C(3)'   | -1.5675  | -0.9050  | 0.7016   |
| C(4)'   | -1.5675  | -0.9050  | -0.7016  |
| C(5)'   | -2.6172  | -1.5111  | -1.3704  |
| C(6)'   | -3.6708  | -2.1193  | -0.6940  |
| F(7)'   | -4.6713  | -2.6970  | 1.3613   |
| F(8)'   | -2.6522  | -1.5312  | 2.7220   |
| F(9)'   | -2.6522  | -1.5312  | -2.7220  |
| F(10)'  | -4.6713  | -2.6970  | -1.3613  |
| C(1)''  | 3.6708   | -2.1193  | 0.6940   |
| C(2)''  | 2.6172   | -1.5111  | 1.3704   |
| C(3)''  | 1.5675   | -0.9050  | 0.7016   |
| C(4)''  | 1.5675   | -0.9050  | -0.7016  |
| C(5)''  | 2.6172   | -1.5111  | -1.3704  |
| C(6)''  | 3.6708   | -2.1193  | -0.6940  |
| F(7)''  | 4.6713   | -2.6970  | 1.3613   |
| F(8)''  | 2.6522   | -1.5312  | 2.7220   |
| F(9)''  | 2.6522   | -1.5312  | -2.7220  |
| F(10)'' | 4.6713   | -2.6970  | -1.3613  |
| Sb(1)   | 0.0000   | 0.0000   | 1.9244   |
| Sb(2)   | 0.0000   | 0.0000   | -1.9244  |

<sup>a</sup> All coordinates in Å.

Energy = -2365.08049 Hartrees (corrected for ZPE).

**Table S13** Calculated [BLYP/LanL2DZ/6-311G\*] coordinates for  $\text{Sb}_2(\text{C}_6\text{F}_4)_3$ .<sup>a</sup>

| Atom    | <i>x</i> | <i>y</i> | <i>z</i> |
|---------|----------|----------|----------|
| C(1)    | 0.0000   | 4.2799   | 0.6992   |
| C(2)    | 0.0000   | 3.0539   | 1.3826   |
| C(3)    | 0.0000   | 1.8324   | 0.7066   |
| C(4)    | 0.0000   | 1.8324   | -0.7066  |
| C(5)    | 0.0000   | 3.0539   | -1.3826  |
| C(6)    | 0.0000   | 4.2799   | -0.6992  |
| F(7)    | 0.0000   | 5.4504   | 1.3739   |
| F(8)    | 0.0000   | 3.1013   | 2.7493   |
| F(9)    | 0.0000   | 3.1013   | -2.7493  |
| F(10)   | 0.0000   | 5.4504   | -1.3739  |
| C(1)'   | -3.7065  | -2.1399  | 0.6992   |
| C(2)'   | -2.6448  | -1.5270  | 1.3826   |
| C(3)'   | -1.5869  | -0.9162  | 0.7066   |
| C(4)'   | -1.5869  | -0.9162  | -0.7066  |
| C(5)'   | -2.6448  | -1.5270  | -1.3826  |
| C(6)'   | -3.7065  | -2.1399  | -0.6992  |
| F(7)'   | -4.7202  | -2.7252  | 1.3739   |
| F(8)'   | -2.6858  | -1.5506  | 2.7493   |
| F(9)'   | -2.6858  | -1.5506  | -2.7493  |
| F(10)'  | -4.7202  | -2.7252  | -1.3739  |
| C(1)''  | 3.7065   | -2.1399  | 0.6992   |
| C(2)''  | 2.6448   | -1.5270  | 1.3826   |
| C(3)''  | 1.5869   | -0.9162  | 0.7066   |
| C(4)''  | 1.5869   | -0.9162  | -0.7066  |
| C(5)''  | 2.6448   | -1.5270  | -1.3826  |
| C(6)''  | 3.7065   | -2.1399  | -0.6992  |
| F(7)''  | 4.7202   | -2.7252  | 1.3739   |
| F(8)''  | 2.6858   | -1.5506  | 2.7493   |
| F(9)''  | 2.6858   | -1.5506  | -2.7493  |
| F(10)'' | 4.7202   | -2.7252  | -1.3739  |
| Sb(1)   | 0.0000   | 0.0000   | 1.9452   |
| Sb(2)   | 0.0000   | 0.0000   | -1.9452  |

<sup>a</sup> All coordinates in Å.

Energy = -1894.87117 Hartrees (corrected for ZPE).

**Table S14** Calculated [BLYP/aug-cc-pVQZ-PP/6-311G\*] coordinates for Sb<sub>2</sub>(C<sub>6</sub>F<sub>4</sub>)<sub>3</sub>.<sup>a</sup>

| Atom    | <i>x</i> | <i>y</i> | <i>z</i> |
|---------|----------|----------|----------|
| C(1)    | 0.0000   | 4.2760   | 0.7001   |
| C(2)    | 0.0000   | 3.0491   | 1.3807   |
| C(3)    | 0.0000   | 1.8290   | 0.7059   |
| C(4)    | 0.0000   | 1.8290   | -0.7059  |
| C(5)    | 0.0000   | 3.0491   | -1.3807  |
| C(6)    | 0.0000   | 4.2760   | -0.7001  |
| F(7)    | 0.0000   | 5.4468   | 1.3743   |
| F(8)    | 0.0000   | 3.0876   | 2.7515   |
| F(9)    | 0.0000   | 3.0876   | -2.7515  |
| F(10)   | 0.0000   | 5.4468   | -1.3743  |
| C(1)'   | -3.7031  | -2.1380  | 0.7001   |
| C(2)'   | -2.6406  | -1.5245  | 1.3807   |
| C(3)'   | -1.5839  | -0.9145  | 0.7059   |
| C(4)'   | -1.5839  | -0.9145  | -0.7059  |
| C(5)'   | -2.6406  | -1.5245  | -1.3807  |
| C(6)'   | -3.7031  | -2.1380  | -0.7001  |
| F(7)'   | -4.7171  | -2.7234  | 1.3743   |
| F(8)'   | -2.6739  | -1.5438  | 2.7515   |
| F(9)'   | -2.6739  | -1.5438  | -2.7515  |
| F(10)'  | -4.7171  | -2.7234  | -1.3743  |
| C(1)''  | 3.7031   | -2.1380  | 0.7001   |
| C(2)''  | 2.6406   | -1.5245  | 1.3807   |
| C(3)''  | 1.5839   | -0.9145  | 0.7059   |
| C(4)''  | 1.5839   | -0.9145  | -0.7059  |
| C(5)''  | 2.6406   | -1.5245  | -1.3807  |
| C(6)''  | 3.7031   | -2.1380  | -0.7001  |
| F(7)''  | 4.7171   | -2.7234  | 1.3743   |
| F(8)''  | 2.6739   | -1.5438  | 2.7515   |
| F(9)''  | 2.6739   | -1.5438  | -2.7515  |
| F(10)'' | 4.7171   | -2.7234  | -1.3743  |
| Sb(1)   | 0.0000   | 0.0000   | 1.9483   |
| Sb(2)   | 0.0000   | 0.0000   | -1.9483  |

<sup>a</sup> All coordinates in Å.

Energy = -2364.56211 Hartrees (corrected for ZPE).



**Table S15** Calculated [MP2/LanL2DZ/6-311G\*] coordinates for Bi<sub>2</sub>(C<sub>6</sub>F<sub>4</sub>)<sub>3</sub>.<sup>a</sup>

| Atom    | <i>x</i> | <i>y</i> | <i>z</i> |
|---------|----------|----------|----------|
| C(1)    | 0.0000   | 4.2777   | 0.6963   |
| C(2)    | 0.0000   | 3.0576   | 1.3733   |
| C(3)    | 0.0000   | 1.8377   | 0.7032   |
| C(4)    | 0.0000   | 1.8377   | -0.7032  |
| C(5)    | 0.0000   | 3.0576   | -1.3733  |
| C(6)    | 0.0000   | 4.2777   | -0.6963  |
| F(7)    | 0.0000   | 5.4329   | 1.3602   |
| F(8)    | 0.0000   | 3.1060   | 2.7224   |
| F(9)    | 0.0000   | 3.1060   | -2.7224  |
| F(10)   | 0.0000   | 5.4329   | -1.3602  |
| C(1)'   | -3.7046  | -2.1389  | 0.6963   |
| C(2)'   | -2.6479  | -1.5288  | 1.3733   |
| C(3)'   | -1.5915  | -0.9188  | 0.7032   |
| C(4)'   | -1.5915  | -0.9188  | -0.7032  |
| C(5)'   | -2.6479  | -1.5288  | -1.3733  |
| C(6)'   | -3.7046  | -2.1389  | -0.6963  |
| F(7)'   | -4.7051  | -2.7165  | 1.3602   |
| F(8)'   | -2.6899  | -1.5530  | 2.7224   |
| F(9)'   | -2.6899  | -1.5530  | -2.7224  |
| F(10)'  | -4.7051  | -2.7165  | -1.3602  |
| C(1)''  | 3.7046   | -2.1389  | 0.6963   |
| C(2)''  | 2.6479   | -1.5288  | 1.3733   |
| C(3)''  | 1.5915   | -0.9188  | 0.7032   |
| C(4)''  | 1.5915   | -0.9188  | -0.7032  |
| C(5)''  | 2.6479   | -1.5288  | -1.3733  |
| C(6)''  | 3.7046   | -2.1389  | -0.6963  |
| F(7)''  | 4.7051   | -2.7165  | 1.3602   |
| F(8)''  | 2.6899   | -1.5530  | 2.7224   |
| F(9)''  | 2.6899   | -1.5530  | -2.7224  |
| F(10)'' | 4.7051   | -2.7165  | -1.3602  |
| Bi(1)   | 0.0000   | 0.0000   | 1.9912   |
| Bi(2)   | 0.0000   | 0.0000   | -1.9912  |

<sup>a</sup> All coordinates in Å.

Energy = -1890.67381 Hartrees (corrected for ZPE)

**Table S16** Calculated [MP2/aug-cc-pVTZ-PP/6-311G\*] coordinates for Bi<sub>2</sub>(C<sub>6</sub>F<sub>4</sub>)<sub>3</sub>.<sup>a</sup>

| Atom    | <i>x</i> | <i>y</i> | <i>z</i> |
|---------|----------|----------|----------|
| C(1)    | 0.0000   | 4.2594   | 0.6980   |
| C(2)    | 0.0000   | 3.0414   | 1.3806   |
| C(3)    | 0.0000   | 1.8267   | 0.7016   |
| C(4)    | 0.0000   | 1.8267   | -0.7016  |
| C(5)    | 0.0000   | 3.0414   | -1.3806  |
| C(6)    | 0.0000   | 4.2594   | -0.6980  |
| F(7)    | 0.0000   | 5.4161   | 1.3583   |
| F(8)    | 0.0000   | 3.0773   | 2.7274   |
| F(9)    | 0.0000   | 3.0773   | -2.7274  |
| F(10)   | 0.0000   | 5.4161   | -1.3583  |
| C(1)'   | -3.6888  | -2.1297  | 0.6980   |
| C(2)'   | -2.6339  | -1.5207  | 1.3806   |
| C(3)'   | -1.5820  | -0.9133  | 0.7016   |
| C(4)'   | -1.5820  | -0.9133  | -0.7016  |
| C(5)'   | -2.6339  | -1.5207  | -1.3806  |
| C(6)'   | -3.6888  | -2.1297  | -0.6980  |
| F(7)'   | -4.6905  | -2.7081  | 1.3583   |
| F(8)'   | -2.6651  | -1.5387  | 2.7274   |
| F(9)'   | -2.6651  | -1.5387  | -2.7274  |
| F(10)'  | -4.6905  | -2.7081  | -1.3583  |
| C(1)''  | 3.6888   | -2.1297  | 0.6980   |
| C(2)''  | 2.6339   | -1.5207  | 1.3806   |
| C(3)''  | 1.5820   | -0.9133  | 0.7016   |
| C(4)''  | 1.5820   | -0.9133  | -0.7016  |
| C(5)''  | 2.6339   | -1.5207  | -1.3806  |
| C(6)''  | 3.6888   | -2.1297  | -0.6980  |
| F(7)''  | 4.6905   | -2.7081  | 1.3583   |
| F(8)''  | 2.6651   | -1.5387  | 2.7274   |
| F(9)''  | 2.6651   | -1.5387  | -2.7274  |
| F(10)'' | 4.6905   | -2.7081  | -1.3583  |
| Bi(1)   | 0.0000   | 0.0000   | 1.9793   |
| Bi(2)   | 0.0000   | 0.0000   | -1.9793  |

<sup>a</sup> All coordinates in Å.

Energy = -2307.87495 Hartrees (corrected for ZPE)

**Table S17** Calculated [B3PW91/LanL2DZ/6-311G\*] coordinates for Bi<sub>2</sub>(C<sub>6</sub>F<sub>4</sub>)<sub>3</sub>.<sup>a</sup>

| Atom    | <i>x</i> | <i>y</i> | <i>z</i> |
|---------|----------|----------|----------|
| C(1)    | 0.0000   | 4.2823   | 0.6933   |
| C(2)    | 0.0000   | 3.0668   | 1.3689   |
| C(3)    | 0.0000   | 1.8572   | 0.6989   |
| C(4)    | 0.0000   | 1.8572   | -0.6989  |
| C(5)    | 0.0000   | 3.0668   | -1.3689  |
| C(6)    | 0.0000   | 4.2823   | -0.6933  |
| F(7)    | 0.0000   | 5.4335   | 1.3578   |
| F(8)    | 0.0000   | 3.1078   | 2.7148   |
| F(9)    | 0.0000   | 3.1078   | -2.7148  |
| F(10)   | 0.0000   | 5.4335   | -1.3578  |
| C(1)'   | -3.7086  | -2.1412  | 0.6933   |
| C(2)'   | -2.6560  | -1.5334  | 1.3689   |
| C(3)'   | -1.6083  | -0.9286  | 0.6989   |
| C(4)'   | -1.6083  | -0.9286  | -0.6989  |
| C(5)'   | -2.6560  | -1.5334  | -1.3689  |
| C(6)'   | -3.7086  | -2.1412  | -0.6933  |
| F(7)'   | -4.7056  | -2.7168  | 1.3578   |
| F(8)'   | -2.6914  | -1.5539  | 2.7148   |
| F(9)'   | -2.6914  | -1.5539  | -2.7148  |
| F(10)'  | -4.7056  | -2.7168  | -1.3578  |
| C(1)''  | 3.7086   | -2.1412  | 0.6933   |
| C(2)''  | 2.6560   | -1.5334  | 1.3689   |
| C(3)''  | 1.6083   | -0.9286  | 0.6989   |
| C(4)''  | 1.6083   | -0.9286  | -0.6989  |
| C(5)''  | 2.6560   | -1.5334  | -1.3689  |
| C(6)''  | 3.7086   | -2.1412  | -0.6933  |
| F(7)''  | 4.7056   | -2.7168  | 1.3578   |
| F(8)''  | 2.6914   | -1.5539  | 2.7148   |
| F(9)''  | 2.6914   | -1.5539  | -2.7148  |
| F(10)'' | 4.7056   | -2.7168  | -1.3578  |
| Bi(1)   | 0.0000   | 0.0000   | 1.9807   |
| Bi(2)   | 0.0000   | 0.0000   | -1.9807  |

<sup>a</sup> All coordinates in Å.

Energy = -1894.58547 Hartrees (corrected for ZPE)

**Table S18** Calculated [B3PW91/aug-cc-pVTZ-PP/6-311G\*] coordinates for Bi<sub>2</sub>(C<sub>6</sub>F<sub>4</sub>)<sub>3</sub>.<sup>a</sup>

| Atom    | <i>x</i> | <i>y</i> | <i>z</i> |
|---------|----------|----------|----------|
| C(1)    | 0.0000   | 4.2841   | 0.6938   |
| C(2)    | 0.0000   | 3.0690   | 1.3694   |
| C(3)    | 0.0000   | 1.8610   | 0.6982   |
| C(4)    | 0.0000   | 1.8610   | -0.6982  |
| C(5)    | 0.0000   | 3.0690   | -1.3694  |
| C(6)    | 0.0000   | 4.2841   | -0.6938  |
| F(7)    | 0.0000   | 5.4367   | 1.3562   |
| F(8)    | 0.0000   | 3.1058   | 2.7164   |
| F(9)    | 0.0000   | 3.1058   | -2.7164  |
| F(10)   | 0.0000   | 5.4367   | -1.3562  |
| C(1)'   | -3.7147  | -2.1409  | 0.6938   |
| C(2)'   | -2.6612  | -1.5352  | 1.3692   |
| C(3)'   | -1.6140  | -0.9330  | 0.6981   |
| C(4)'   | -1.6140  | -0.9330  | -0.6981  |
| C(5)'   | -2.6612  | -1.5352  | -1.3692  |
| C(6)'   | -3.7147  | -2.1409  | -0.6938  |
| F(7)'   | -4.7140  | -2.7149  | 1.3567   |
| F(8)'   | -2.6933  | -1.5532  | 2.7162   |
| F(9)'   | -2.6933  | -1.5532  | -2.7162  |
| F(10)'  | -4.7140  | -2.7149  | -1.3567  |
| C(1)''  | 3.7147   | -2.1409  | 0.6938   |
| C(2)''  | 2.6612   | -1.5352  | 1.3692   |
| C(3)''  | 1.6140   | -0.9330  | 0.6981   |
| C(4)''  | 1.6140   | -0.9330  | -0.6981  |
| C(5)''  | 2.6612   | -1.5352  | -1.3692  |
| C(6)''  | 3.7147   | -2.1409  | -0.6938  |
| F(7)''  | 4.7140   | -2.7149  | 1.3567   |
| F(8)''  | 2.6933   | -1.5532  | 2.7162   |
| F(9)''  | 2.6933   | -1.5532  | -2.7162  |
| F(10)'' | 4.7140   | -2.7149  | -1.3567  |
| Bi(1)   | 0.0000   | 0.0000   | 1.9882   |
| Bi(2)   | 0.0000   | 0.0000   | -1.9882  |

<sup>a</sup> All coordinates in Å.

Energy = -2313.03393 Hartrees (corrected for ZPE)

**Table S19** Calculated [B3LYP/LanL2DZ/6-311G\*] coordinates for Bi<sub>2</sub>(C<sub>6</sub>F<sub>4</sub>)<sub>3</sub>.<sup>a</sup>

| Atom    | <i>x</i> | <i>y</i> | <i>z</i> |
|---------|----------|----------|----------|
| C(1)    | 0.0000   | 4.2929   | 0.6939   |
| C(2)    | 0.0000   | 3.0759   | 1.3700   |
| C(3)    | 0.0000   | 1.8641   | 0.7003   |
| C(4)    | 0.0000   | 1.8641   | -0.7003  |
| C(5)    | 0.0000   | 3.0759   | -1.3700  |
| C(6)    | 0.0000   | 4.2929   | -0.6939  |
| F(7)    | 0.0000   | 5.4495   | 1.3614   |
| F(8)    | 0.0000   | 3.1166   | 2.7225   |
| F(9)    | 0.0000   | 3.1166   | -2.7225  |
| F(10)   | 0.0000   | 5.4495   | -1.3614  |
| C(1)'   | -3.7178  | -2.1465  | 0.6939   |
| C(2)'   | -2.6638  | -1.5379  | 1.3700   |
| C(3)'   | -1.6144  | -0.9321  | 0.7003   |
| C(4)'   | -1.6144  | -0.9321  | -0.7003  |
| C(5)'   | -2.6638  | -1.5379  | -1.3700  |
| C(6)'   | -3.7178  | -2.1465  | -0.6939  |
| F(7)'   | -4.7194  | -2.7247  | 1.3614   |
| F(8)'   | -2.6990  | -1.5583  | 2.7225   |
| F(9)'   | -2.6990  | -1.5583  | -2.7225  |
| F(10)'  | -4.7194  | -2.7247  | -1.3614  |
| C(1)''  | 3.7178   | -2.1465  | 0.6939   |
| C(2)''  | 2.6638   | -1.5379  | 1.3700   |
| C(3)''  | 1.6144   | -0.9321  | 0.7003   |
| C(4)''  | 1.6144   | -0.9321  | -0.7003  |
| C(5)''  | 2.6638   | -1.5379  | -1.3700  |
| C(6)''  | 3.7178   | -2.1465  | -0.6939  |
| F(7)''  | 4.7194   | -2.7247  | 1.3614   |
| F(8)''  | 2.6990   | -1.5583  | 2.7225   |
| F(9)''  | 2.6990   | -1.5583  | -2.7225  |
| F(10)'' | 4.7194   | -2.7247  | -1.3614  |
| Bi(1)   | 0.0000   | 0.0000   | 1.9857   |
| Bi(2)   | 0.0000   | 0.0000   | -1.9857  |

<sup>a</sup> All coordinates in Å.

Energy = -1895.26698 Hartrees (corrected for ZPE)

**Table S20** Calculated [B3LYP/aug-cc-pVTZ-PP/6-311G\*] coordinates for Bi<sub>2</sub>(C<sub>6</sub>F<sub>4</sub>)<sub>3</sub>.<sup>a</sup>

| Atom    | <i>x</i> | <i>y</i> | <i>z</i> |
|---------|----------|----------|----------|
| C(1)    | 0.0000   | 4.3062   | 0.6945   |
| C(2)    | 0.0000   | 3.0892   | 1.3696   |
| C(3)    | 0.0000   | 1.8790   | 0.6993   |
| C(4)    | 0.0000   | 1.8790   | -0.6993  |
| C(5)    | 0.0000   | 3.0892   | -1.3696  |
| C(6)    | 0.0000   | 4.3062   | -0.6945  |
| F(7)    | 0.0000   | 5.4635   | 1.3610   |
| F(8)    | 0.0000   | 3.1255   | 2.7238   |
| F(9)    | 0.0000   | 3.1255   | -2.7238  |
| F(10)   | 0.0000   | 5.4635   | -1.3610  |
| C(1)'   | -3.7293  | -2.1531  | 0.6945   |
| C(2)'   | -2.6753  | -1.5446  | 1.3696   |
| C(3)'   | -1.6273  | -0.9395  | 0.6993   |
| C(4)'   | -1.6273  | -0.9395  | -0.6993  |
| C(5)'   | -2.6753  | -1.5446  | -1.3696  |
| C(6)'   | -3.7293  | -2.1531  | -0.6945  |
| F(7)'   | -4.7315  | -2.7317  | 1.3610   |
| F(8)'   | -2.7067  | -1.5627  | 2.7238   |
| F(9)'   | -2.7067  | -1.5627  | -2.7238  |
| F(10)'  | -4.7315  | -2.7317  | -1.3610  |
| C(1)''  | 3.7293   | -2.1531  | 0.6945   |
| C(2)''  | 2.6753   | -1.5446  | 1.3696   |
| C(3)''  | 1.6273   | -0.9395  | 0.6993   |
| C(4)''  | 1.6273   | -0.9395  | -0.6993  |
| C(5)''  | 2.6753   | -1.5446  | -1.3696  |
| C(6)''  | 3.7293   | -2.1531  | -0.6945  |
| F(7)''  | 4.7315   | -2.7317  | 1.3610   |
| F(8)''  | 2.7067   | -1.5627  | 2.7238   |
| F(9)''  | 2.7067   | -1.5627  | -2.7238  |
| F(10)'' | 4.7315   | -2.7317  | -1.3610  |
| Bi(1)   | 0.0000   | 0.0000   | 2.0010   |
| Bi(2)   | 0.0000   | 0.0000   | -2.0010  |

<sup>a</sup> All coordinates in Å.

Energy = -2313.80950 Hartrees (corrected for ZPE)

**Table S21** Calculated [BLYP/LanL2DZ/6-311G\*] coordinates for Bi<sub>2</sub>(C<sub>6</sub>F<sub>4</sub>)<sub>3</sub>.<sup>a</sup>

| Atom    | <i>x</i> | <i>y</i> | <i>z</i> |
|---------|----------|----------|----------|
| C(1)    | 0.0000   | 4.3264   | 0.6997   |
| C(2)    | 0.0000   | 3.0996   | 1.3807   |
| C(3)    | 0.0000   | 1.8796   | 0.7049   |
| C(4)    | 0.0000   | 1.8796   | -0.7049  |
| C(5)    | 0.0000   | 3.0996   | -1.3807  |
| C(6)    | 0.0000   | 4.3264   | -0.6997  |
| F(7)    | 0.0000   | 5.4989   | 1.3741   |
| F(8)    | 0.0000   | 3.1406   | 2.7518   |
| F(9)    | 0.0000   | 3.1406   | -2.7518  |
| F(10)   | 0.0000   | 5.4989   | -1.3741  |
| C(1)'   | -3.7467  | -2.1632  | 0.6997   |
| C(2)'   | -2.6843  | -1.5498  | 1.3807   |
| C(3)'   | -1.6278  | -0.9398  | 0.7049   |
| C(4)'   | -1.6278  | -0.9398  | -0.7049  |
| C(5)'   | -2.6843  | -1.5498  | -1.3807  |
| C(6)'   | -3.7467  | -2.1632  | -0.6997  |
| F(7)'   | -4.7621  | -2.7494  | 1.3741   |
| F(8)'   | -2.7198  | -1.5703  | 2.7518   |
| F(9)'   | -2.7198  | -1.5703  | -2.7518  |
| F(10)'  | -4.7621  | -2.7494  | -1.3741  |
| C(1)''  | 3.7467   | -2.1632  | 0.6997   |
| C(2)''  | 2.6843   | -1.5498  | 1.3807   |
| C(3)''  | 1.6278   | -0.9398  | 0.7049   |
| C(4)''  | 1.6278   | -0.9398  | -0.7049  |
| C(5)''  | 2.6843   | -1.5498  | -1.3807  |
| C(6)''  | 3.7467   | -2.1632  | -0.6997  |
| F(7)''  | 4.7621   | -2.7494  | 1.3741   |
| F(8)''  | 2.7198   | -1.5703  | 2.7518   |
| F(9)''  | 2.7198   | -1.5703  | -2.7518  |
| F(10)'' | 4.7621   | -2.7494  | -1.3741  |
| Bi(1)   | 0.0000   | 0.0000   | 2.0012   |
| Bi(2)   | 0.0000   | 0.0000   | -2.0012  |

<sup>a</sup> All coordinates in Å.

Energy = -1894.96409 Hartrees (corrected for ZPE)

**Table S22** Calculated [BLYP/aug-cc-pVTZ-PP/6-311G\*] coordinates for Bi<sub>2</sub>(C<sub>6</sub>F<sub>4</sub>)<sub>3</sub>.<sup>a</sup>

| Atom    | <i>x</i> | <i>y</i> | <i>z</i> |
|---------|----------|----------|----------|
| C(1)    | 0.0000   | 4.3476   | 0.7006   |
| C(2)    | 0.0000   | 3.1205   | 1.3799   |
| C(3)    | 0.0000   | 1.9026   | 0.7035   |
| C(4)    | 0.0000   | 1.9026   | -0.7035  |
| C(5)    | 0.0000   | 3.1205   | -1.3799  |
| C(6)    | 0.0000   | 4.3476   | -0.7006  |
| F(7)    | 0.0000   | 5.5203   | 1.3745   |
| F(8)    | 0.0000   | 3.1549   | 2.7535   |
| F(9)    | 0.0000   | 3.1549   | -2.7535  |
| F(10)   | 0.0000   | 5.5203   | -1.3745  |
| C(1)'   | -3.7652  | -2.1738  | 0.7006   |
| C(2)'   | -2.7024  | -1.5602  | 1.3799   |
| C(3)'   | -1.6477  | -0.9513  | 0.7035   |
| C(4)'   | -1.6477  | -0.9513  | -0.7035  |
| C(5)'   | -2.7024  | -1.5602  | -1.3799  |
| C(6)'   | -3.7652  | -2.1738  | -0.7006  |
| F(7)'   | -4.7808  | -2.7602  | 1.3745   |
| F(8)'   | -2.7323  | -1.5775  | 2.7535   |
| F(9)'   | -2.7323  | -1.5775  | -2.7535  |
| F(10)'  | -4.7808  | -2.7602  | -1.3745  |
| C(1)''  | 3.7652   | -2.1738  | 0.7006   |
| C(2)''  | 2.7024   | -1.5602  | 1.3799   |
| C(3)''  | 1.6477   | -0.9513  | 0.7035   |
| C(4)''  | 1.6477   | -0.9513  | -0.7035  |
| C(5)''  | 2.7024   | -1.5602  | -1.3799  |
| C(6)''  | 3.7652   | -2.1738  | -0.7006  |
| F(7)''  | 4.7808   | -2.7602  | 1.3745   |
| F(8)''  | 2.7323   | -1.5775  | 2.7535   |
| F(9)''  | 2.7323   | -1.5775  | -2.7535  |
| F(10)'' | 4.7808   | -2.7602  | -1.3745  |
| Bi(1)   | 0.0000   | 0.0000   | 2.0242   |
| Bi(2)   | 0.0000   | 0.0000   | -2.0242  |

<sup>a</sup> All coordinates in Å.

Energy = -2313.34741 Hartrees (corrected for ZPE)
